# Supplementary material for: Grafting of dodecylsulfate groups on gadolinium hydroxocation nanosheets for self-construction of a lamellar structure
Source: Royal Society of Chemistry journal article supplement (doi:10.1039/c0jm03149f), 2011-01-01
Supplement: c0jm03149f.pdf [file c0jm03149f.pdf]

## **Electronic Supplementary Information**

### **“Grafting of dodecylsulfate groups on hydroxocation nanosheets for self-construction of lamellar structure”**

Byung-Il Lee, Su-Yeon Lee and Song-Ho Byeon\*

*Department of Applied Chemistry, College of Applied Science, Kyung Hee University,  
Gyeonggi 446-701, Korea.*

e-mail: shbyun@khu.ac.kr (S.-H. B.)

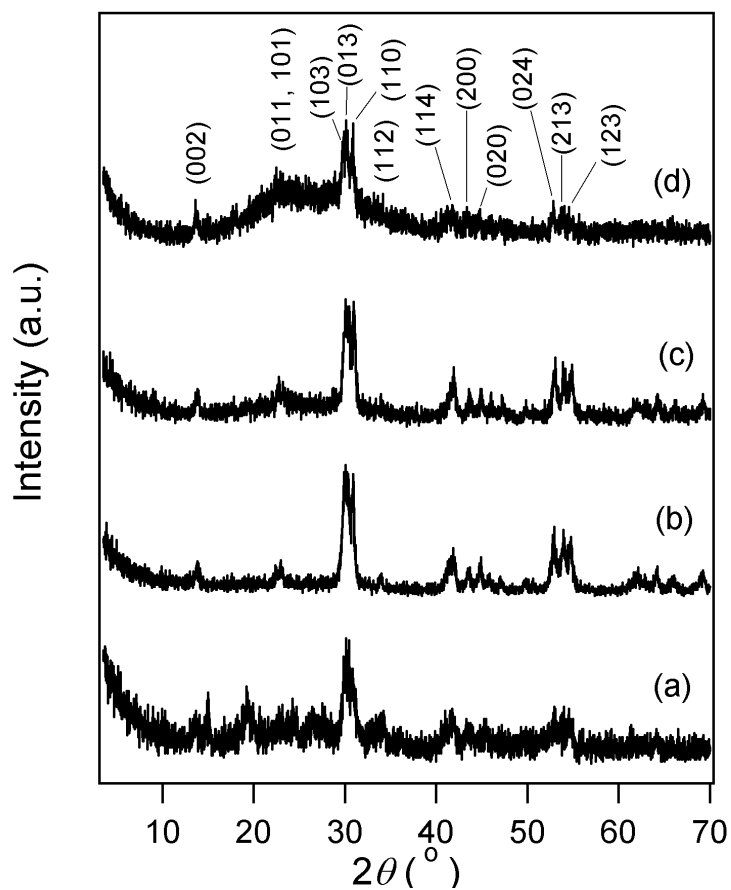

**Fig. S1.** Powder X-ray diffraction patterns of DS-LGdH(ex)s prepared at pH = (a) 6.0, (b) 7.0, (c) 8.0 and (d) 10.0 after heated at 700 °C, respectively. The  $(hkl)$  indexations were based on the structure of  $\text{Gd}_2\text{O}_2\text{SO}_4$ .

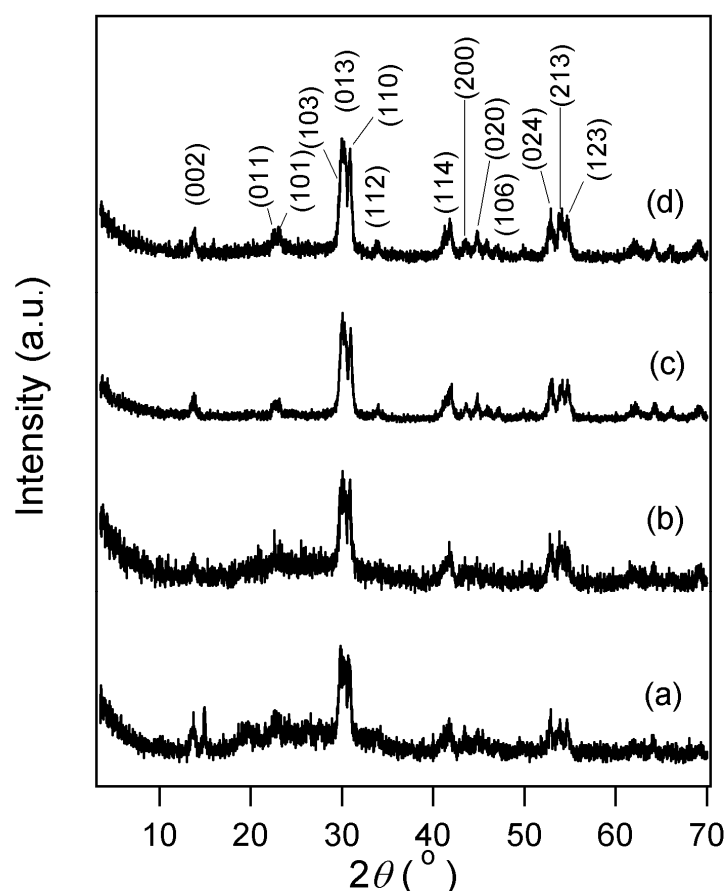

**Fig. S2.** Powder X-ray diffraction patterns of DS-LGdH(ds)s prepared at pH = (a) 6.0, (b) 7.0, (c) 8.0 and (d) 10.0 after heated at 700 °C, respectively. The  $(hkl)$  indexations were based on the structure of  $\text{Gd}_2\text{O}_2\text{SO}_4$ .
